# Supplementary material for: Plekhg5 controls the unconventional secretion of Sod1 by presynaptic secretory autophagy
Source: PubMed Central journal article supplement (PMC11452647; doi:10.1038/s41467-024-52875-5), 2024-10-04
Supplement: 41467_2024_52875_MOESM1_ESM.pdf [file 41467_2024_52875_MOESM1_ESM.pdf]

## **Supplementary Information**

### **Plekhg5 controls the unconventional secretion of Sod1 by presynaptic secretory autophagy**

Amy-Jayne Hutchings, Bitá Hambrecht, Alexander Veh, Neha Jadhav Giridhar, Abdolhossein Zare, Christina Angerer, Thorben Ohnesorge, Maren Schenke, Bhuvaneish T. Selvaraj, Siddharthan Chandran, Jared Sternecker, Susanne Petri, Bettina Seeger, Michael Briese, Christian Stigloher, Thorsten Bischler, Andreas Hermann, Markus Damme, Michael Sendtner, Patrick Lüningschrör

#### **Content:**

**Supplementary Figures 1-4**

**Supplementary Table 1: Cell lines**

**Supplementary Table 2: Mouse strains**

**Supplementary Table 3: Plasmids**

**Supplementary Table 4: Primary antibodies for immunohistochemistry**

**Supplementary Table 5: Primary antibodies for Western blot**

**Supplementary Table 6: Oligonucleotides**

## Supplementary Figures

### Supplementary Figure 1

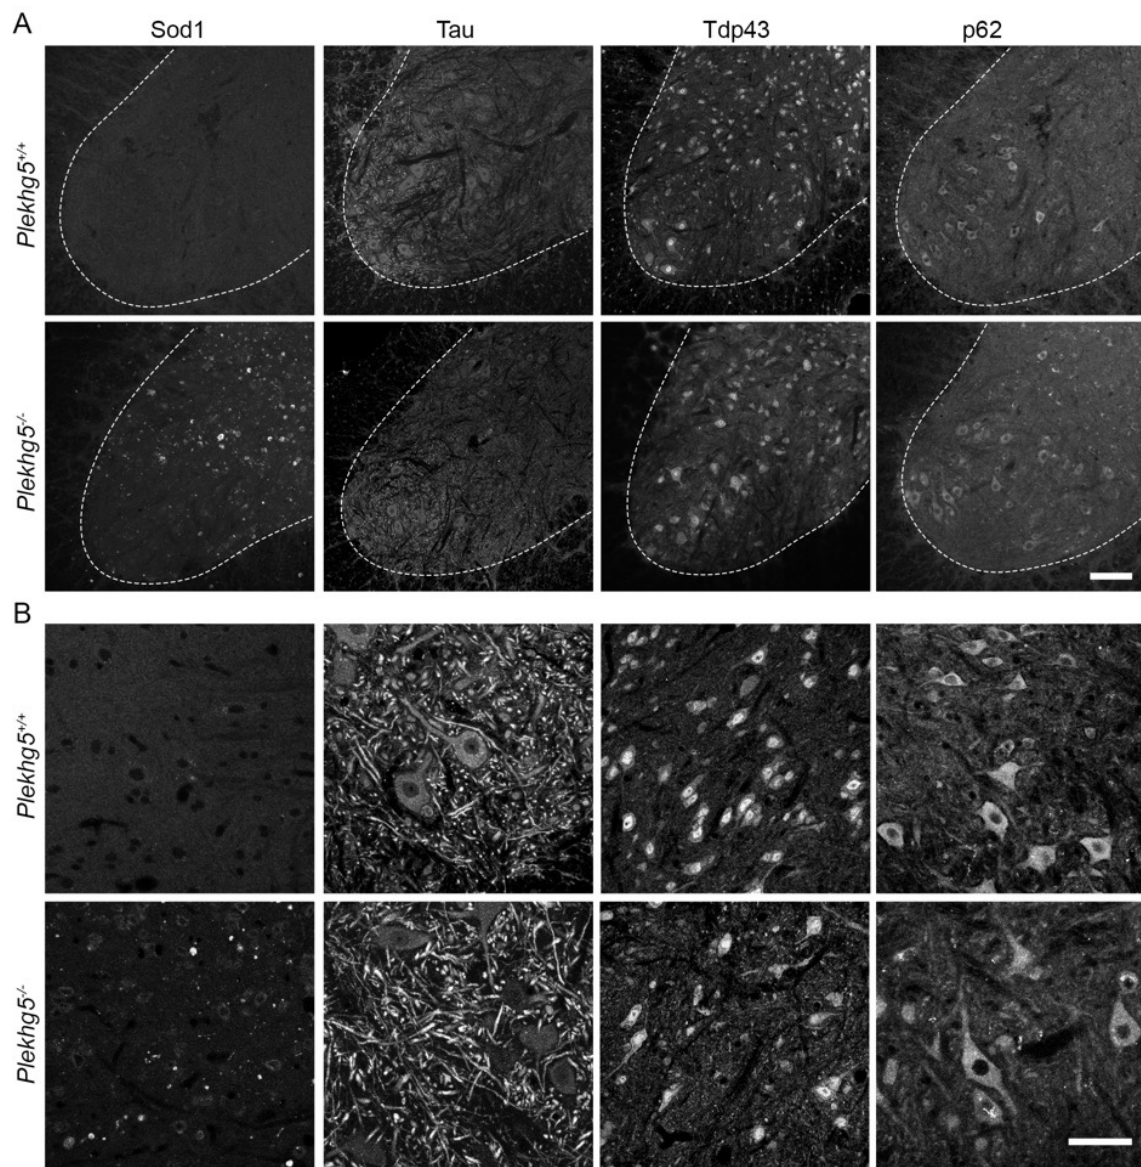

**Plekhg5 deficiency does not result in a general accumulation of aggregation-prone proteins. (A, B)** Lumbar spinal cord cross sections from wildtype and *Plekhg5*-deficient mice stained for Sod1, Tau, Tdp43 and p62. Images of the ventral horn are shown in (A). Higher magnifications are shown in (B). Note that *Plekhg5* deficiency only caused accumulations of Sod1. Scale bar upper panel: 100  $\mu$ m; Scale bar lower panel: 50  $\mu$ m. The images are representative of at least three biological replicates.

## Supplementary Figure 2

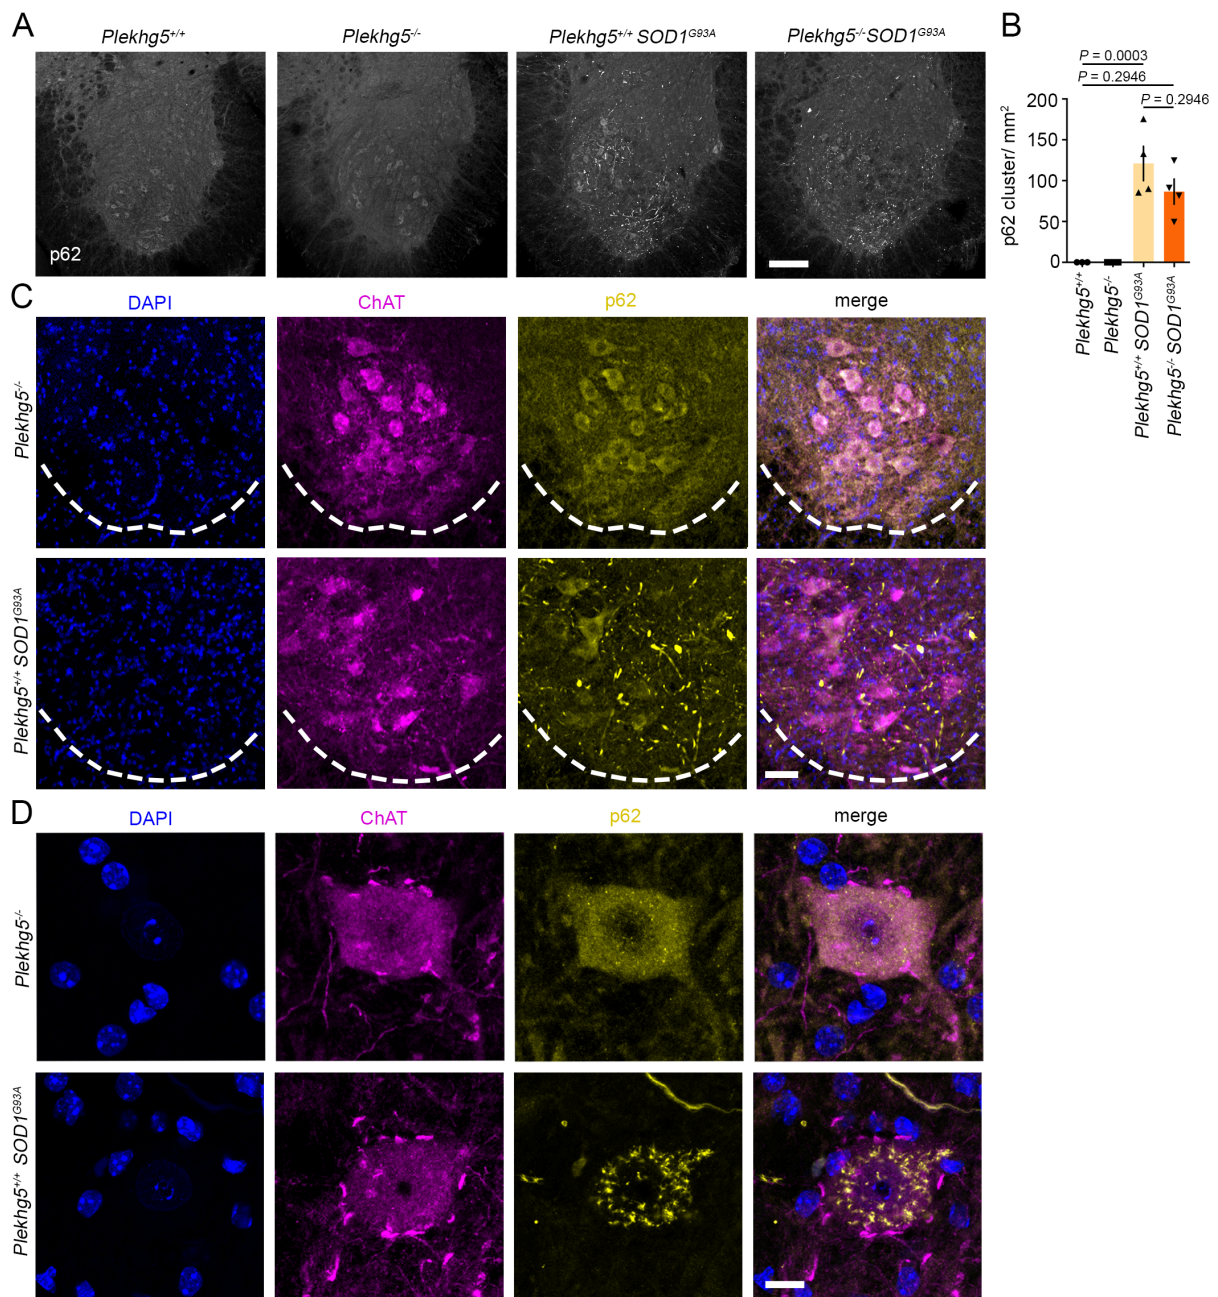

**Plekhg5** depletion in *SOD1*<sup>G93A</sup> mice does not affect the accumulation of p62 within the spinal cord. (A) Spinal cord cross sections stained for p62. Depletion of *Plekhg5* did not cause any differences in the number of p62 clusters in *SOD1*<sup>G93A</sup>-expressing mice. The images are representative of at least three biological replicates. Scale bar: 200  $\mu$ m. (B) Quantification of p62 clusters. Mean $\pm$ SEM. One-way ANOVA; Tukey's Multiple Comparisons. *Plekhg5*<sup>+/+</sup>, n=3; *Plekhg5*<sup>-/-</sup>, n=4; *Plekhg5*<sup>+/+</sup> *Sod1*<sup>G93A</sup>, n=4; *Plekhg5*<sup>-/-</sup> *Sod1*<sup>G93A</sup>, n=4; biological replicates. Mean $\pm$ SEM. (C, D) Spinal cord cross sections co-stained for p62 and ChAT (C). High magnification images of an individual spinal motoneuron (D). p62 clusters were absent in *Plekhg5*-deficient mice, and only detectable in *SOD1*<sup>G93A</sup>-expressing mice. The images are representative of at least three biological replicates. (C) Scale bar: 50  $\mu$ m. (D) Scale bar: 10  $\mu$ m.

### Supplementary Figure 3

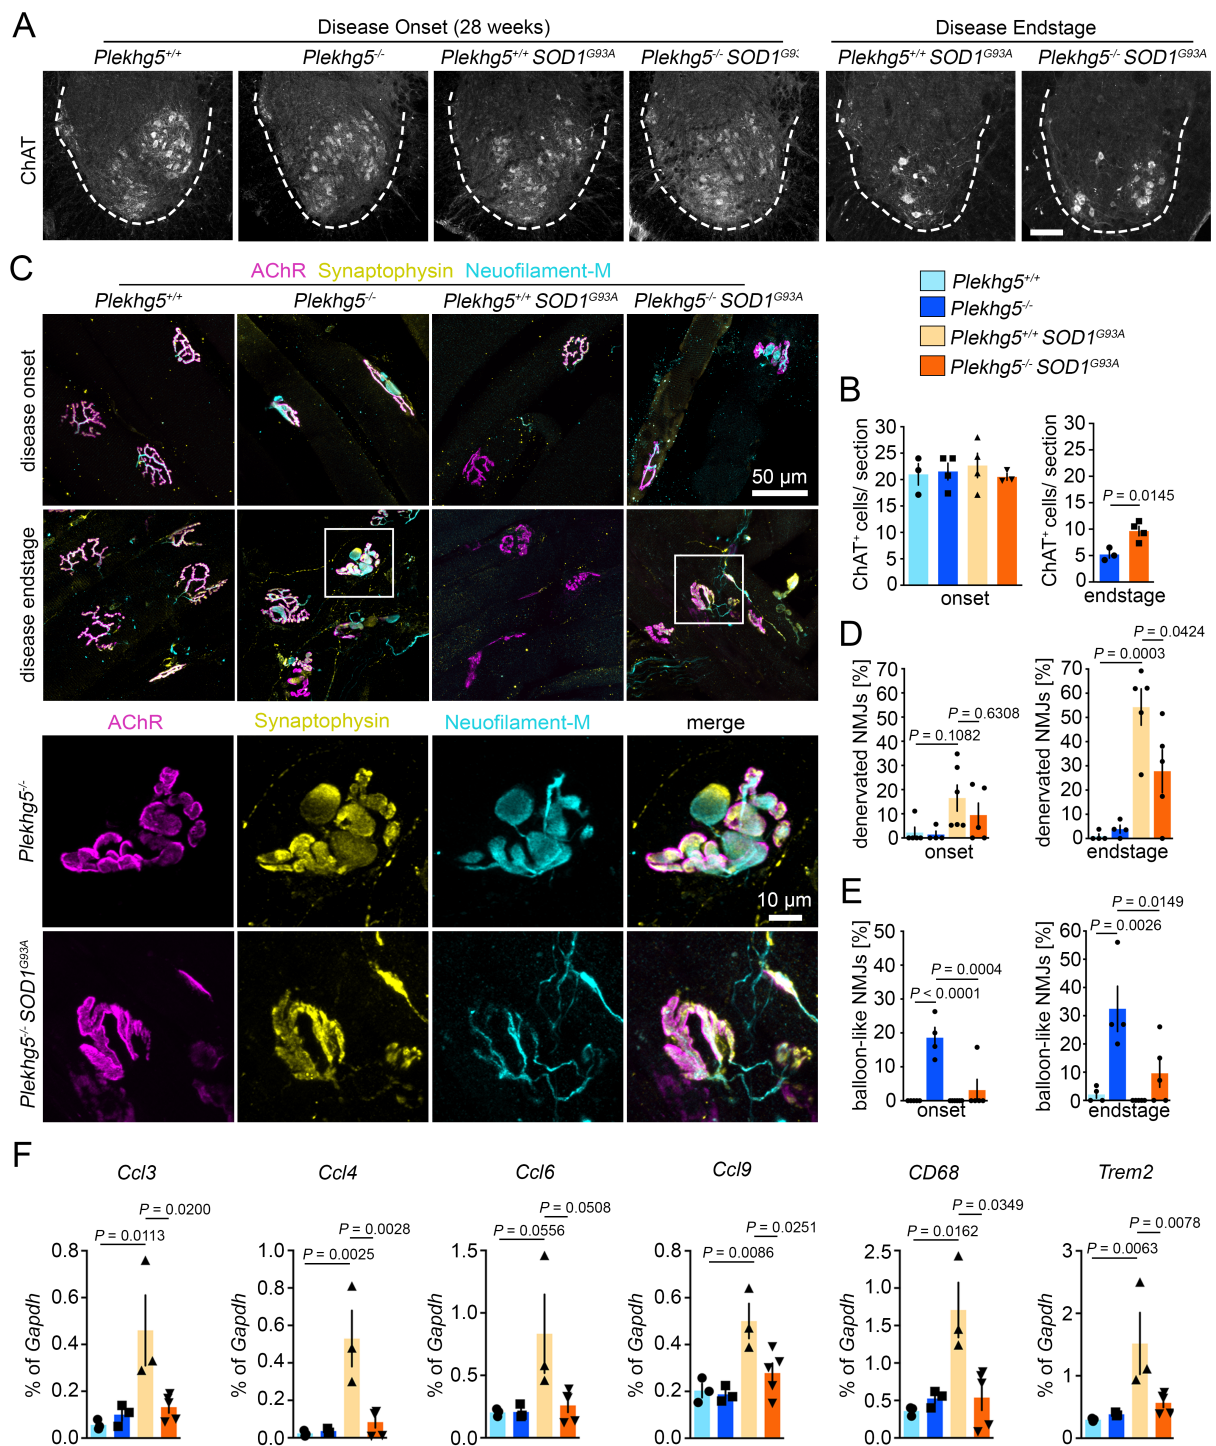

**Motoneuron quantification and NMJ characterization. (A)** ChAT staining in spinal cord sections of *Plekhg5<sup>+/+</sup>*, *Plekhg5<sup>-/-</sup>*, *Plekhg5<sup>+/+</sup> Sod1<sup>G93A</sup>* and *Plekhg5<sup>-/-</sup> Sod1<sup>G93A</sup>* mice at disease onset and disease endstage show reduced ChAT levels in *Plekhg5<sup>+/+</sup> Sod1<sup>G93A</sup>* and *Plekhg5<sup>-/-</sup> Sod1<sup>G93A</sup>* mice at disease endstage. Scale bar: 200  $\mu$ m. The images are representative of at least three biological replicates. **(B)** Quantification of ChAT<sup>+</sup> cells. MN survival in *Plekhg5<sup>-/-</sup> Sod1<sup>G93A</sup>* mice was slightly, but significantly improved at the disease endstage compared to *Plekhg5<sup>+/+</sup> SOD1<sup>G93A</sup>* mice. t-test, two-tailed. Onset: *Plekhg5<sup>+/+</sup>*, n=3; *Plekhg5<sup>-/-</sup>*, n=4; *Plekhg5<sup>+/+</sup> Sod1<sup>G93A</sup>*, n=4; *Plekhg5<sup>-/-</sup> Sod1<sup>G93A</sup>*, n=3. Endstage:

*Plekhg5*<sup>+/+</sup> *Sod1*<sup>G93A</sup>, n=3; *Plekhg5*<sup>-/-</sup> *Sod1*<sup>G93A</sup>, n=4; biological replicates. **(C)** NMJs visualized by BTX, synaptophysin and NF-M staining in *Plekhg5*<sup>+/+</sup>, *Plekhg5*<sup>-/-</sup>, *Plekhg5*<sup>+/+</sup> *Sod1*<sup>G93A</sup> and *Plekhg5*<sup>-/-</sup> *Sod1*<sup>G93A</sup> mice. Note that balloon-like NMJs are only present in *Plekhg5*<sup>-/-</sup> and *Plekhg5*<sup>-/-</sup> *Sod1*<sup>G93A</sup> mice. The images are representative of at least three biological replicates. **(D, E)** Quantification of denervated NMJs and balloon-like NMJs at the disease onset (D) and endstage (E). NMJ denervation is significantly increased in *Plekhg5*<sup>+/+</sup> *Sod1*<sup>G93A</sup> compared to *Plekhg5*<sup>-/-</sup> and *Plekhg5*<sup>-/-</sup> *Sod1*<sup>G93A</sup> mice at disease onset and endstage. Balloon-like NMJs structures in *Plekhg5*<sup>-/-</sup> and *Plekhg5*<sup>-/-</sup> *Sod1*<sup>G93A</sup> mice increase at disease endstage but do not coincide with NMJ denervation. One-way ANOVA; Tukey's Multiple Comparisons. Onset: *Plekhg5*<sup>+/+</sup>, n=5; *Plekhg5*<sup>-/-</sup>, n=4; *Plekhg5*<sup>+/+</sup> *Sod1*<sup>G93A</sup>, n=6; *Plekhg5*<sup>-/-</sup> *Sod1*<sup>G93A</sup>, n=5. Endstage: *Plekhg5*<sup>+/+</sup>, n=4; *Plekhg5*<sup>-/-</sup>, n=4; *Plekhg5*<sup>+/+</sup> *Sod1*<sup>G93A</sup>, n=5; *Plekhg5*<sup>-/-</sup> *Sod1*<sup>G93A</sup>, n=5; biological replicates. **(F)** Reduced microglia activation *Plekhg5*<sup>-/-</sup> *Sod1*<sup>G93A</sup>. Expression of selected transcripts associated with microglia activation were analyzed by qPCR. *Plekhg5*<sup>+/+</sup>, n=3; *Plekhg5*<sup>-/-</sup>, n=3; *Plekhg5*<sup>+/+</sup> *Sod1*<sup>G93A</sup>, n=3; *Plekhg5*<sup>-/-</sup> *Sod1*<sup>G93A</sup>, n=5; biological replicates. One-way ANOVA; Tukey's Multiple Comparisons.

All data are shown as Mean±SEM.

## Supplementary Figure 4

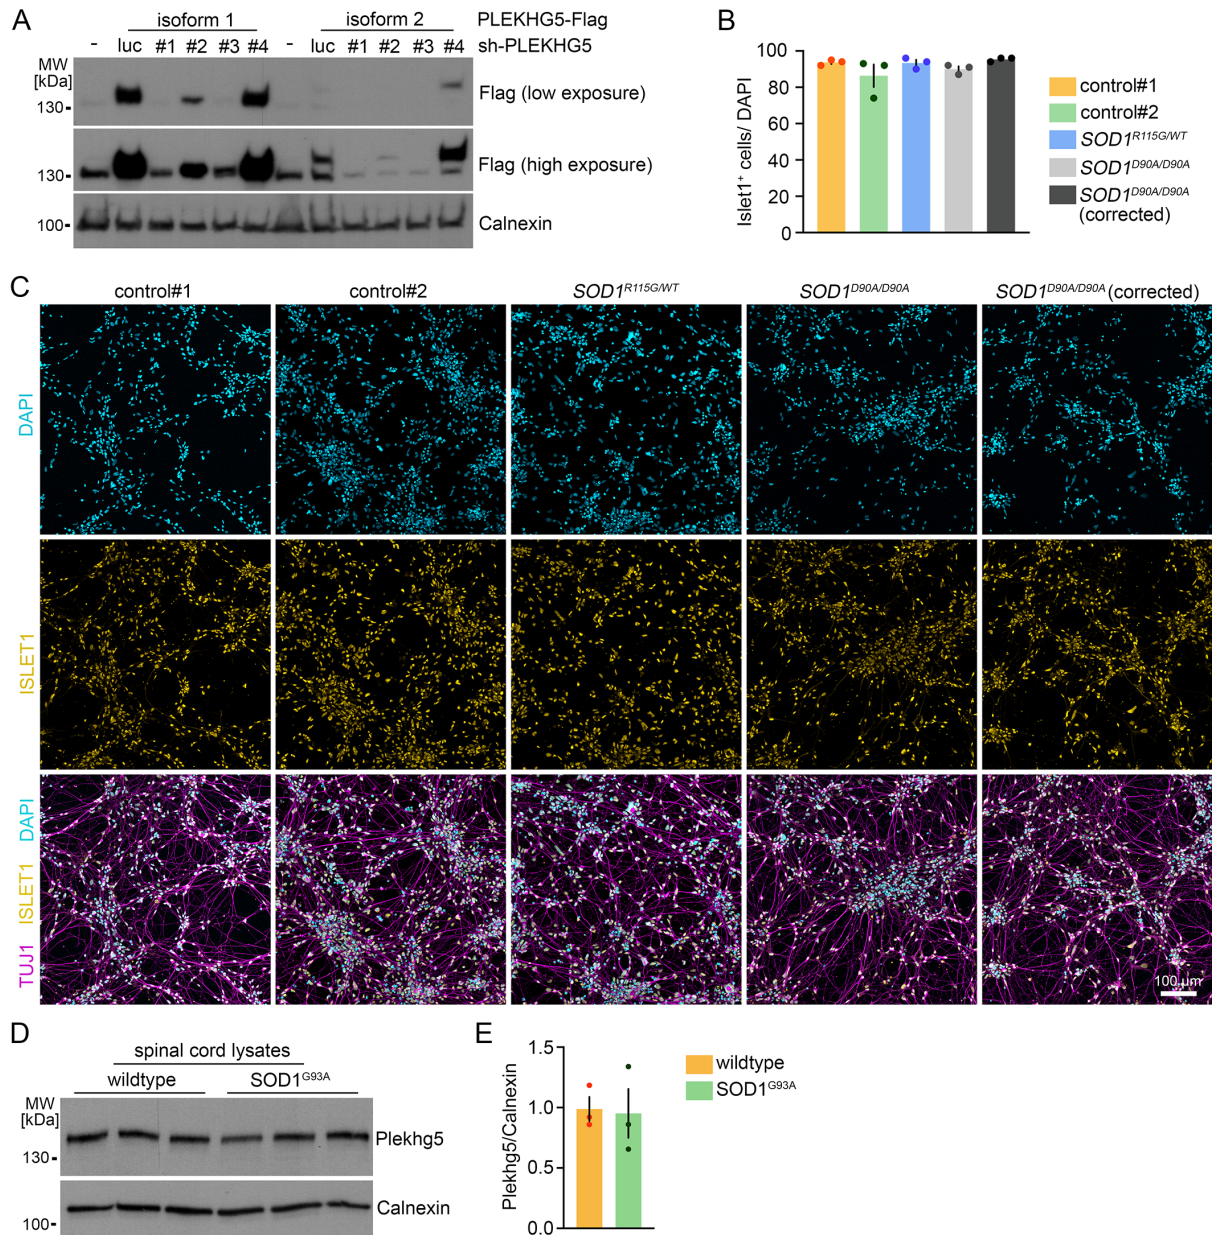

**Secretion of SOD1 in hiPSC-derived MNs.** (A) Four different sh-sequences were tested for their efficiency to knockdown PLEKHG5. Flag-*PLEKHG5* Isoform 1 and Isoform 2 were transfected into 293FT cells along the indicated plasmids for expression of the individual sh-RNAs. (B) Quantification of the percentage of *Islet1*<sup>+</sup> cells per nuclei. Each data point represents the percentage of at least 700 cells analyzed per cell line. Three independent differentiations. n=3 biological replicates. (C) iPSC-derived MNs stained for *Islet1* and *Tuj1* after two weeks of maturation. Low magnification images of the immunocytochemical stainings revealed no major differences in the differentiation efficiency between the indicated iPSC-lines. The images are representative of at least three biological replicates. (D) Western blot showing the *Plekhhg5* expression in spinal cord lysates of wildtype and *SOD1*<sup>G93A</sup> mice. (E) Quantification of the *Plekhhg5* expression normalized to *Calnexin*. n=3 biological replicates. All data are shown as Mean ± SEM.

## Supplementary Tables

Supplementary Table 1: Cell lines

| iPSC Line                          | Genotype           | Reference |
|------------------------------------|--------------------|-----------|
| 34D6 - control iPSC-line #1        | WT                 | [84]      |
| IMR90- control iPSC line #2        | WT                 | [77]      |
| SOD1 R115G                         | heterozygous R115G | [85]      |
| SOD1 D90A                          | homozygous D90A    | [60]      |
| SOD1 D90A igc - (isogenic control) | WT                 | [86]      |

Supplementary Table 2: Mouse strains

| Name                   | Genetic background                        | Source               |
|------------------------|-------------------------------------------|----------------------|
| CD1                    | CrI:CD1(ICR)                              | Charles River 022CD1 |
| Plekhg5 <sup>-/-</sup> | B6.Pekgh5/J                               | [17]                 |
| SOD1 <sup>G93A</sup>   | B6SJL-TgN(SOD1-G93A) <sup>dl</sup> 1Gur/J | Jackson Lab, #002300 |
| Thy1::YFP              | B6.Cg-Tg(Thy1-YFP)23Jrs/J                 | Jackson Lab, #003782 |
| mRFP-GFP-LC3           | C57BL/6-Tg(CAG-RFP/EGFP/Map1lc3b)1Hill/J  | Jackson Lab, #027139 |

Supplementary Table 3: Plasmids

| Name              | Reference  |
|-------------------|------------|
| pSIH-shLuciferase | [17]       |
| pSIH-shPlekhg5#D  | [17]       |
| pSIH-shPlekhg5#E  | [17]       |
| pSIH-shPLEKHG5#1  | this study |
| pSIH-shPLEKHG5#2  | this study |
| pSIH-shPLEKHG5#3  | this study |
| pSIH-shPLEKHG5#4  | this study |
| pSIH-shAtg9#1     | this study |
| pSIH-shAtg9#2     | this study |
| pSIH-shAtg9#1     | this study |
| pSIH-shStx17#1    | this study |
| pSIH-shStx17#2    | this study |
| pSIH-shSnap29#1   | this study |
| pSIH-shSnap29#2   | this study |
| pSIH-shSnap23#1   | this study |
| pSIH-shSnap23#2   | this study |
| FUV-3xFlag-LC3    | this study |

Supplementary Table 4: Primary antibodies for immunohistochemistry:

| Name                | Company                     | Catalogue number |
|---------------------|-----------------------------|------------------|
| Synaptophysin-1     | Synaptic systems            | 101 400          |
| Neurofilament heavy | Millipore Sigma             | AB5539           |
| Sod1 (mouse)        | Enzo Life Science           | ADI-SOD-100-F    |
| SOD1 (human) (71G8) | Cell Signaling Technologies | 4266             |
| Lamp1               | Invitrogen                  | 14-1071-82       |
| Lamp1               | DSHB                        | 1D4B             |
| ChAT                | Millipore Sigma             | ab144P           |

|            |                          |             |
|------------|--------------------------|-------------|
| GFP        | Abcam                    | ab13970     |
| RFP        | Rockland                 | 600-401-379 |
| p62        | Progen                   | GP62-C      |
| CD68       | Bio-Rad                  | MCA1957T    |
| CathepsinD | Santa Cruz Biotechnology | 6494        |
| Iba1       | Synaptic systems         | 234 004     |
| Ubiquitin  | Proteintech              | 10201-2-AP  |
| Tau        | Sigma-Aldrich            | T6402       |
| TDP43      | Proteintech              | 22309-1-AP  |
| Islet      | Synaptic systems         | 406 003     |

Supplementary Table 5: Primary antibodies for Western blot:

| Name                | Company                     | Catalogue number |
|---------------------|-----------------------------|------------------|
| Sod1 (mouse)        | Enzo Life Science           | ADI-SOD-100-F    |
| SOD1 (human) (71G8) | Cell Signaling Technologies | 4266             |
| Actin               | Santa Cruz Biotechnology    | Sc-8432          |
| TUJ-1               | Neuromics                   | MO15013          |
| Atg9                | Abcam                       | ab108338         |
| LC3B                | Novus Biologicals           | NB100-2220       |
| Atg5                | Cell Signaling Technologies | 12994            |
| Calnexin            | SicGen antibodies           | AB0041-200       |
| anti-GM130          | BD Biosciences              | 610822           |
| Lamp-1              | Invitrogen                  | 14-1071-82       |
| Cytochrome C        | Santa Cruz Biotechnology    | sc-13156         |
| Tsg101              | Proteintech                 | 14497-1-AP       |
| Flag M2 Agarose     | Millipore Sigma             | A2220            |
| Flag                | Sigma life sciences         | F7425-2MG        |
| Cathepsin D         | Dauids Biotechnology        | Custom made      |
| Adaptin y           | BD Biosciences              | 610385           |
| eIF2 $\alpha$       | Cell Signaling Technologies | 3597             |
| Plekhg5             | Proteintech                 | 19830-1-AP       |
| Rab5a               | Cell Signaling Technologies | 46449            |
| Snap23              | Synaptic Systems            | 111 205          |
| Snap29              | Synaptic Systems            | 111 303          |
| Syntaxin17          | Proteintech                 | 17815-1-AP       |
| Rab26               | Synaptic Systems            | 269 011          |
| Histone H3          | Abcam                       | ab1791           |

Supplementary Table 6: Oligonucleotides:

| Name                 | Sequence 5' - 3'            | Company  | Reference  |
|----------------------|-----------------------------|----------|------------|
| <i>Ccl3</i> qPCR Fwd | TCT CCT ACA GCC GGA AGA TTC | metabion | this study |
| <i>Ccl3</i> qPCR Rev | CTT TGG AGT CAG CGC AGA TC  | metabion | this study |
| <i>Ccl4</i> qPCR Fwd | TCC CAC TTC CTG CTG TTT CT  | metabion | this study |
| <i>Ccl4</i> qPCR Rev | ATG TAC TCA GTG ACC CAG GG  | metabion | this study |
| <i>Ccl6</i> qPCR Fwd | TGC CAC ACA GAT CCC ATG TA  | metabion | this study |
| <i>Ccl6</i> qPCR Rev | CTC TGA ACT CTC CGA TCG CT  | metabion | this study |
| <i>Ccl9</i> qPCR Fwd | GCC TGT CCT ATA ACT CAC GGA | metabion | this study |
| <i>Ccl9</i> qPCR Rev | TTG TAG GTC CGT GGT TGT GA  | metabion | this study |
| <i>CD68</i> qPCR Fwd | ACA AAA CCA AGG TCC AGG GA  | metabion | this study |



|                       |                            |          |            |
|-----------------------|----------------------------|----------|------------|
| <i>CD68</i> qPCR Rev  | CAC ATT GTA TTC CAC CGC CA | metabion | this study |
| <i>Trem2</i> qPCR Fwd | ATG CTG GAG ATC TCT GGG TC | metabion | this study |
| <i>Trem2</i> qPCRRev  | AGA AGA ATG GAG GTG GGT GG | metabion | this study |

| Name                                          | Sequence 5' - 3'                   | Company  | Reference             |
|-----------------------------------------------|------------------------------------|----------|-----------------------|
| Plekhg5 <sup>-/-</sup> , Geno Fwd             | TAAAAGCTGGCAGCCTGAAT               | metabion | [17]                  |
| Plekhg5 <sup>-/-</sup> , Geno Genetrapp-Rev   | GCTAGCACAACCCCTCACTC               | metabion | [17]                  |
| Plekhg5 <sup>-/-</sup> , Geno Rev             | ACCCCAAGGTCTGTCCTCTT               | metabion | [17]                  |
| Fwd SOD Ex 4f                                 | CAT CAG CCC TAA TCC ATC TGA        | metabion | Jackson Lab, oIMR0113 |
| Rev SOD Ex 4r                                 | CGC GAC TAA CAA TCA AAG TGA        | metabion | Jackson Lab, oIMR0114 |
| Thy1::YFP                                     | TCC TTG AAG AAG ATG GTC CG         | metabion | Jackson Lab, oIMR1416 |
| Thy1::YFP                                     | AAG TTC ATC TGC ACC ACC            | metabion | Jackson Lab, oIMR0872 |
| Atg5 <sup>n/n</sup> ; 1                       | GAA TAT GAA GGC ACA CCC CTG AAA TG | metabion | [2]                   |
| Atg5 <sup>n/n</sup> ; 2                       | ACA ACG TCG AGC ACA GCT GCG CAA GG | metabion | [2]                   |
| Atg5 <sup>n/n</sup> ; 3                       | GTA CTG CAT AAT GGT TTA ACT CTT GC | metabion | [2]                   |
| mRFP-GFP-LC3 Transgene Fwd A GFP              | CAT GGA CGA GCT GTA CAA GT         | metabion | Jackson Lab, #24935   |
| mRFP-GFP-LC3 Transgene Rev A Map1LC3B;        | CAC CGT GAT CAG GTA CAA GGA        | metabion | Jackson Lab, #24936   |
| mRFP-GFP-LC3 Internal positive control Fwd A, | CTA GGC CAC AGA ATT GAA AGA TCT    | metabion | Jackson Lab, oIMR7338 |
| mRFP-GFP-LC3 Internal positive control Rev A, | GTA GGT GGA AAT TCT AGC ATC ATC C  | metabion | Jackson Lab, oIMR7339 |

| sh-RNA              | Sequence 5' - 3'                                                    | Company  | Reference  |
|---------------------|---------------------------------------------------------------------|----------|------------|
| sh-Atg9#1 sense     | GATCCTGTAGGAGCAGGATGGAAATACTTCCTG TCAGATATTTCCATCCTGCTCCTACATTTTTG  | metabion | this study |
| sh-Atg9#1 antisense | AATTCAAAAATGTAGGAGCAGGATGGAAATAT CTGACAGGAAGTATTTCCATCCTGCTCCTACA G | metabion | this study |
| sh-Atg9#2 sense     | GATCCGTGGACTATGACATCCTATTTCTTCCTGT CAGAGTGGACTATGACATCCTATTTTTTTTG  | metabion | this study |
| sh-Atg9#2 antisense | AATTCAAAAAGTGGACTATGACATCCTATTTTC TGACAGGAAGGTGGACTATGACATCCTATTTG  | metabion | this study |

|                               |                                                                         |          |            |
|-------------------------------|-------------------------------------------------------------------------|----------|------------|
| sh-<br>PLEKHG5#1<br>sense     | GATCCGAATGCTTCACTCTGAAATTTCTTCCTGT<br>CAGAAAATTTTCAGAGTGAAGCATTCTTTTTG  | metabion | this study |
| sh-<br>PLEKHG5#1<br>antisense | AATTCAAAAAGAATGCTTCACTCTGAAATTTTC<br>TGACAGGAAGAAATTTTCAGAGTGAAGCATTTCG | metabion | this study |
| sh-<br>PLEKHG5#2<br>sense     | GATCCGAGGTGCTGCTGCCTGTATTTCTTCCTGT<br>CAGAAAATACAGGCAGCAGCACCTCTTTTTG   | metabion | this study |
| sh-<br>PLEKHG5#2<br>antisense | AATTCAAAAAGAGGTGCTGCTGCCTGTATTTTC<br>TGACAGGAAGAAATACAGGCAGCAGCACCTCG   | metabion | this study |
| sh-<br>PLEKHG5#3<br>sense     | GATCCGACAAGCTCCTGAAGGAATTTCTTCCTG<br>TCAGAAAATTCCTTCAGGAGCTTGTCTTTTTG   | metabion | this study |
| sh-<br>PLEKHG5#3<br>antisense | AATTCAAAAAGACAAGCTCCTGAAGGAATTTTC<br>TGACAGGAAGAAATTCCTTCAGGAGCTTGTTCG  | metabion | this study |
| sh-<br>PLEKHG5#4<br>sense     | GATCCTGGCTGGGTGGACACCATTTACTTCCTGT<br>CAGATAAATGGTGTCCACCCAGCCATTTTTG   | metabion | this study |
| sh-<br>PLEKHG5#4<br>antisense | AATTCAAAAATGGCTGGGTGGACACCATTTATC<br>TGACAGGAAGTAAATGGTGTCCACCCAGCCAG   | metabion | this study |
| sh-Stx17#1<br>sense           | GATCCCAGAGTCTGACTCAGATATATCTTCCTGT<br>CAGAATATATCTGAGTCAGACTCTGTTTTG    | metabion | this study |
| sh-Stx17#1<br>antisense       | AATTCAAAAACAGAGTCTGACTCAGATATATTC<br>TGACAGGAAGATATATCTGAGTCAGACTCTGG   | metabion | this study |
| sh-Stx17#2<br>sense           | GATCCACCTTAGAAGCGGACTTAATTCTTCCTGT<br>CAGAAATTAAGTCCGCTTCTAAGGTTTTTTG   | metabion | this study |
| sh-Stx17#2<br>antisense       | AATTCAAAAACCTTAGAAGCGGACTTAATTTTC<br>TGACAGGAAGAATTAAGTCCGCTTCTAAGGTG   | metabion | this study |
| sh-Snap29#1<br>sense          | GATCCGAGTGTGTTTGGAGGATTTATCTTCCTGT<br>CAGAATAAATCCTCCAAACACACTCTTTTTG   | metabion | this study |
| sh-Snap29#1<br>antisense      | AATTCAAAAAGAGTGTGTTTGGAGGATTTATTC<br>TGACAGGAAGATAAATCCTCCAAACACACTCG   | metabion | this study |
| sh-Snap29#2<br>sense          | GATCCGACAAGCTAGATGTCAATATACTTCCTG<br>TCAGATATATTGACATCTAGCTTGTCTTTTTG   | metabion | this study |
| sh-Snap29#2<br>antisense      | AATTCAAAAAGACAAGCTAGATGTCAATATATC<br>TGACAGGAAGTATATTGACATCTAGCTTGTTCG  | metabion | this study |
| sh-Snap23#1<br>sense          | GATCCAGAAGGCATGGACCAAATAAACTTCCTG<br>TCAGATTTATTTGGTCCATGCCTTCTTTTTG    | metabion | this study |
| sh-Snap23#1<br>antisense      | AATTCAAAAAGAAGGCATGGACCAAATAAAT<br>CTGACAGGAAGTTTATTTGGTCCATGCCTTCTG    | metabion | this study |
| sh-Snap23#2<br>sense          | GATCCGCCAGTGGTGGATACATTAAACTTCCTG<br>TCAGATTTAATGTATCCACCACTGGCTTTTTG   | metabion | this study |
| sh-Snap23#2<br>antisense      | AATTCAAAAAGCCAGTGGTGGATACATTAATC<br>TGACAGGAAGTTAATGTATCCACCACTGGCG     | metabion | this study |
